# Supplementary material
Source: PubMed Central journal article supplement (PMC3000964)
Supplement: supp_M110.170068_jbc.M110.170068-1.pdf [file supp_M110.170068_jbc.M110.170068-1.pdf]

|                         |                        |
|-------------------------|------------------------|
| <i>Bt_PDE6B_397-417</i> | GVAT FYNRKDGKPFDEQDEVL |
| <i>Rp_PDE6B_398-419</i> | GVAT FYNRKDGKPFDEQDETL |
| <i>Rp_PDE6A_398-419</i> | GVAT FYNRKDGKPFDEMDEVL |
| <i>Hs_PDE6C_401-421</i> | GVAT FYNRKDGKPFDEHDEYI |

**Suppl. Figure 1.** Anti-bovine PDE6B antibodies 63F raised against residues 397-417. Sequence alignment of bovine PDE6B-397-417 with corresponding sequences of human PDE6C and frog PDE6A and PDE6B indicates that antibodies Ab 63F recognize PDE6C, PDE6C-A, PDE6C-B, frog PDE6A and PDE6B equally well.

*Bt - Bos taurus, Rp - Rana pipiens, Hs - Homo sapiens.*

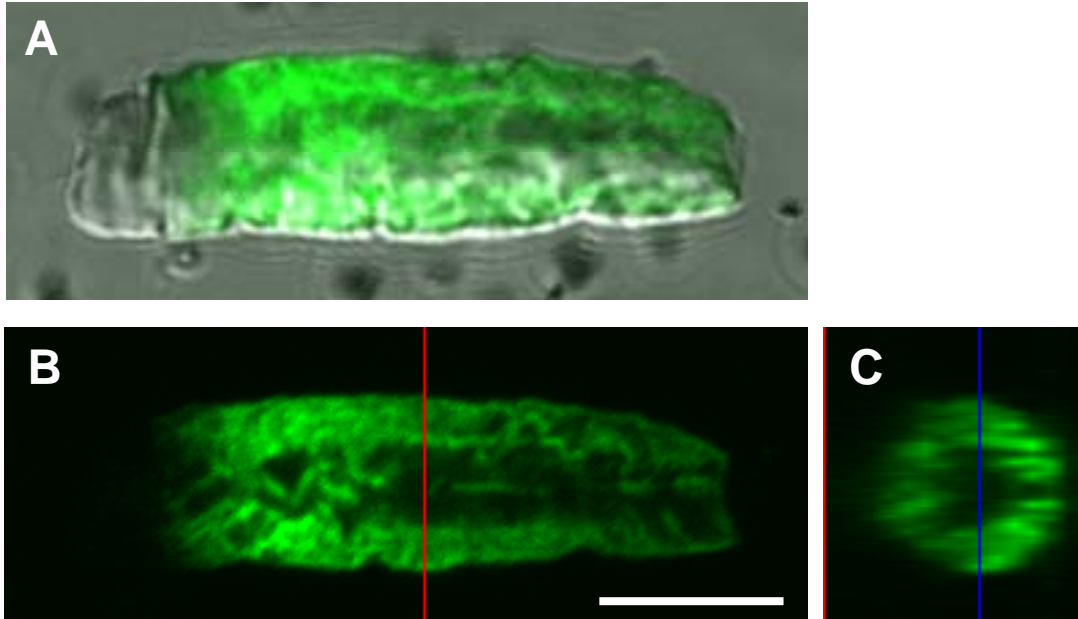

**Suppl. Figure 2. EGFP-fluorescence in a dissociated EGFP-PDE6C-B rod.**

(A) EGFP-fluorescence/DIC overlay. (B) EGFP-fluorescence - a Z section through the center of the ROS. (C) Cross-section of the ROS corresponding to the position identified by red line was reconstructed from the Z-scan stack with an interval of 0.9  $\mu\text{m}$ . Bar – 10  $\mu\text{m}$ .

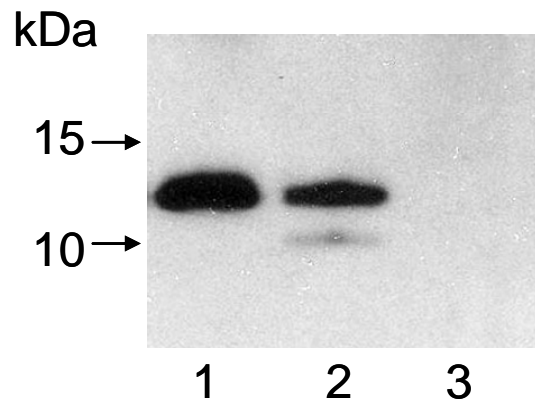

**Suppl. Figure 3.** The beads with bound EGFP-PDE6C (1) were treated with thrombin (2) or trypsin (3), and proteins released into the soluble fraction were separated on a 10% polyacrylamide gel with Tris-tricine buffer system and analyzed by immunoblotting with anti-P $\gamma$ -63-87 antibodies. The 10-kDa band in lane 2 is apparently an N-terminally truncated P $\gamma$ .

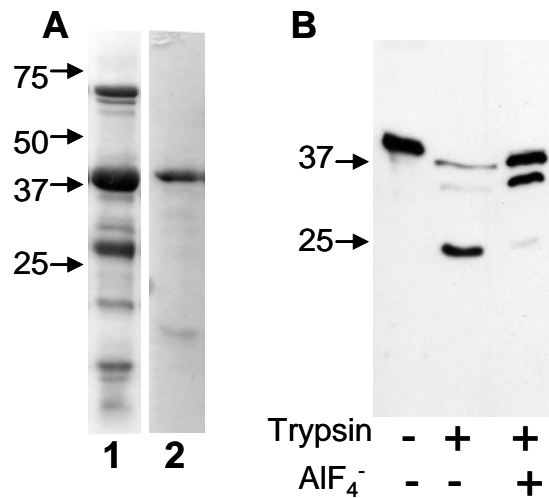

**Suppl. Figure 4. A.** Purification of human  $G\alpha_{12}$  from *E. coli* extract. Coomassie-stained gel: **lane 1** - His-tagged  $G\alpha_{12}$  purified on Ni-NTA resin (Novagen), **lane 2** -  $G\alpha_{12}$  after purification using a MonoQ(5/5) column. **B.** Trypsin-protection test demonstrates the ability of purified  $G\alpha_{12}$  to adopt an active conformation and confirms proper folding of the protein. Purified recombinant  $G\alpha_{12}$  (0.1 mg/ml) was treated with trypsin (25  $\mu$ g/ml) for 10 min at 25<sup>o</sup>C in the presence of 100  $\mu$ M GDP and in the absence or presence of 30  $\mu$ M AlCl<sub>3</sub> /10 mM NaF. The reaction was stopped with 10 fold molar excess of SB-trypsin inhibitor and the proteins were analyzed by Western blotting with anti- $G\alpha_{12}$  specific antibodies I-20 (Santa Cruz Biotech).

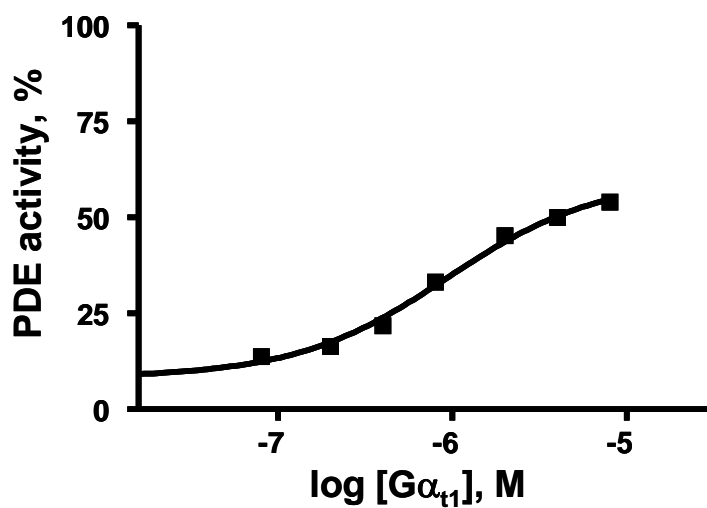

**Suppl. Figure 5.** Bovine rod PDE6 was treated with thrombin (2 units, restriction grade) (Novagen) for 2 hrs at 25<sup>0</sup>C and activated with various concentrations of the GTPγS-bound bovine Gα<sub>11</sub> ( $K_{1/2}=940\pm 100$  nM). PDE activities are expressed as % of the maximal level obtained with trypsin treatment.
